# Supplementary material for: Fisetin, a 3,7,3′,4′-Tetrahydroxyflavone Inhibits the PI3K/Akt/mTOR and MAPK Pathways and Ameliorates Psoriasis Pathology in 2D and 3D Organotypic Human Inflammatory Skin Models
Source: Cells. 2019 Sep 15;8(9):1089. doi: 10.3390/cells8091089 (PMC6770767; doi:10.3390/cells8091089)
Supplement: Supplementary file 1 [file cells-08-01089-s001.pdf]

Article

# Fisetin, a 3, 7, 3', 4'-tetrahydroxyflavone inhibits PI3K/Akt/mTOR and MAPK Pathways and Ameliorates Psoriasis Pathology in 2D and 3D Organotypic Human Inflammatory Skin Models

Jean Christopher Chamcheu<sup>1,\*</sup>, Stephane Esnault<sup>2</sup>, Vaqar M. Adhami<sup>3</sup>, Andrea L. Noll<sup>2</sup>, Sergette Banang-Mbeumi<sup>1,†</sup>, Tithi Roy<sup>1</sup>, Sitanshu S. Singh<sup>1</sup>, Shile Huang<sup>4,5</sup>, Konstantin Gus Kousoulas<sup>6</sup>, and Hasan Mukhtar<sup>2</sup>

Supplementary Materials:

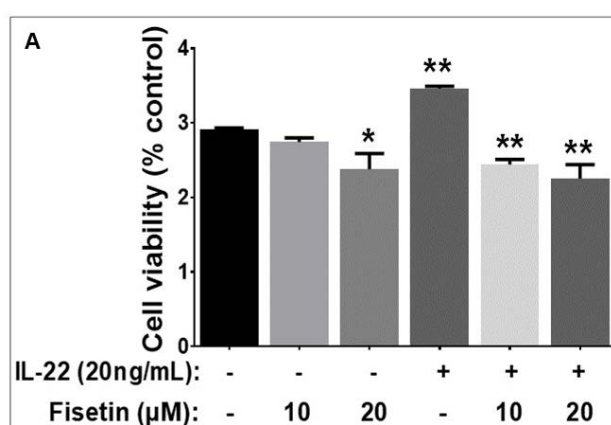

**Figure S1:** Fisetin significantly and dose-dependently suppressed the IL-22 induced proliferation of 2D culture NHEKs by MTT assay, compared with precancerous (HaCaT) and cancer (A431) cell lines (\*\* $p < 0.05$  to \*\*\* $p < 0.001$ ).

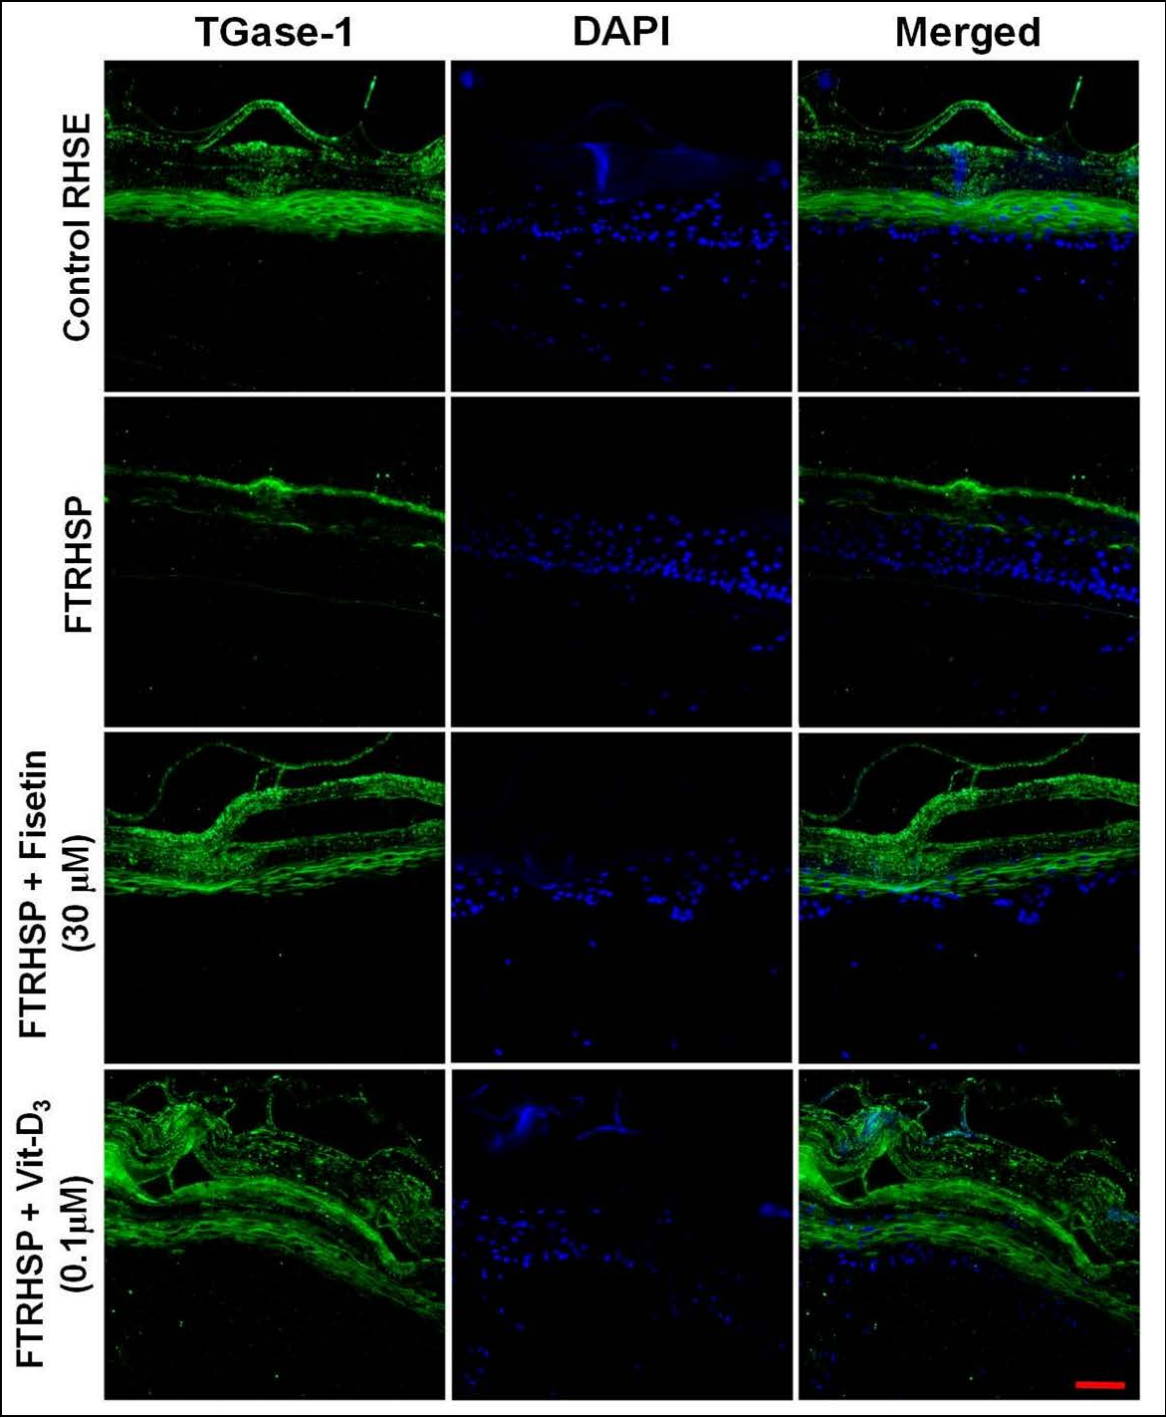

**Figure S2:** Representative photomicrographs of immunofluorescent staining showing the protein expression levels of differentiation marker (TGase-1) in control (RHSE) and FTRHSP conditions versus (fisetin or vit-D<sub>3</sub>)-treated FTRHSP tissues. Data green (TGase-1); blue (DAPI) and mixed staining is merged representation. Results are representative of three independent experiments each performed in quadruplicate and comparing control RHSE vs treated FTRHSP. TGase-1 = transglutaminase-1. Scale Bar = 20 μm.
